# Supplementary material for: Are Re(i) phenanthroline complexes suitable candidates for OLEDs? Answers from DFT and TD-DFT investigations
Source: Royal Society of Chemistry journal article supplement (doi:10.1039/c4cp01135j), 2014-08-04

## Supporting Information

### Are Re(I) Phenanthroline Complexes Suitable Candidates for OLEDs?

#### Answers from DFT and TD-DFT Investigations

Gunasekaran Velmurugan, Balajangamanahalli K. Ramamoorthi‡ and

Ponnambalam Venuvanalingam\*

Theoretical and Computational Chemistry Laboratory

School of Chemistry

Bharathidasan University

Tiruchirappalli- 620 024

\* Author for correspondence

E-Mail: [venuvanalingam@yahoo.com](mailto:venuvanalingam@yahoo.com), Ph: ++91-431-2407053, Fax: ++91-431-2407045

‡ Present address: UFZ Department of Ecological Chemistry, Helmholtz Centre for Environmental Research, Permoserstrasse. 15, Leipzig, Germany, and Institute for Organic Chemistry, Technical University Bergakademie Freiberg, Leipziger Strasse. 29, 09596 Freiberg, Germany.

**Table S1.** The optimized ground state geometries of complex **1** obtained using different functional with LANL2DZ<sup>#</sup> basis set along with the experimental data.

|                 | PBE1PBE | B3LYP | B3P86 | BPBE  | BPW91 | Exp*  |
|-----------------|---------|-------|-------|-------|-------|-------|
| Bond length (Å) |         |       |       |       |       |       |
| Re-C1           | 1.915   | 1.926 | 1.916 | 1.922 | 1.923 | 1.917 |
| Re-C2           | 1.915   | 1.926 | 1.916 | 1.922 | 1.923 | 1.915 |
| Re-C3           | 1.962   | 1.976 | 1.964 | 1.971 | 1.972 | 1.952 |
| Re-C4           | 2.144   | 2.168 | 2.147 | 2.159 | 2.161 | 2.144 |
| Re-N1           | 2.182   | 2.214 | 2.184 | 2.194 | 2.197 | 2.165 |
| Re-N2           | 2.182   | 2.214 | 2.184 | 2.194 | 2.197 | 2.177 |
| Bond angle (°)  |         |       |       |       |       |       |
| C1-Re-C2        | 90.45   | 90.95 | 90.59 | 90.67 | 90.70 | 90.21 |
| N1-Re-N2        | 75.42   | 74.95 | 75.44 | 75.50 | 75.43 | 75.77 |

\* X-ray crystal diffraction data (ref. 29)

# LANL2DZ for Re atom, 6-31g(d) for all other atoms

**Table S2.** The optimized ground state geometries of complex **1** obtained using PBE1PBE functional with different basis sets along with the experimental data.

|                 | LANL2DZ/6-31G(d) | LANL2DZ /6-311G(d) | LANL2DZ /6-311+G(d) | Exp*  |
|-----------------|------------------|--------------------|---------------------|-------|
| Bond length (Å) |                  |                    |                     |       |
| Re-C1           | 1.915            | 1.915              | 1.917               | 1.917 |
| Re-C2           | 1.915            | 1.915              | 1.917               | 1.915 |
| Re-C3           | 1.962            | 1.965              | 1.961               | 1.952 |
| Re-C4           | 2.144            | 2.146              | 2.158               | 2.144 |
| Re-N1           | 2.182            | 2.184              | 2.185               | 2.165 |
| Re-N2           | 2.182            | 2.184              | 2.185               | 2.177 |
| Bond angle (°)  |                  |                    |                     |       |
| C1-Re-C2        | 90.45            | 89.83              | 89.44               | 90.21 |
| N1-Re-N2        | 75.42            | 75.21              | 75.17               | 75.77 |

\* X-ray crystal diffraction data (ref. 29)

**Table S3.** The calculated lowest-lying transitions of complex **1** obtained using different functional with LANL2DZ<sup>#</sup> basis set.

|        |            |            |            |            |            |            |              |
|--------|------------|------------|------------|------------|------------|------------|--------------|
|        | PBE1PBE    | B3LYP      | B3P86      | BPBE       | BPW91      | M06        | M06-2X       |
| Peak 1 | 422 (2.94) | 442 (2.81) | 439 (2.82) | 571 (2.17) | 572 (2.17) | 426 (2.91) | 326 (3.80)   |
|        | M05        | M05-2X     | TPSSLYP1W  | wB97XD     | M11        | M11-L      | Exp*/nm (eV) |
| Peak 1 | 428 (2.89) | 323 (3.83) | 531 (2.33) | 336 (3.69) | 295 (4.19) | 507 (2.44) | 380 (3.26)   |

\* ref. 29

# LANL2DZ for Re atom, 6-31g(d) for all other atoms

**Table S4.** TD-DFT calculation on the lowest-lying absorption of complex **1** using PBE1PBE functional with different basis sets.

|        | LANL2DZ /6-31G(d) | LANL2DZ /6-311G(d) | LANL2DZ /6-311+G(d) |
|--------|-------------------|--------------------|---------------------|
| Peak 1 | 422               | 425                | 423                 |

**Table S5.** Calculated and experimental emission energies of complex **1**.

|                | $\Delta E_{T_1-S_0}$ (eV)/(nm) | CIS/nm | TD-DFT/nm | Exp*/nm |
|----------------|--------------------------------|--------|-----------|---------|
| $\lambda_{em}$ | 2.23/556                       | 585    | 591       | 602     |

\* ref. 29

$\Delta E_{T_1-S_0}$  is the energy difference between the ground singlet and triplet.

**Table S6.** Frontier molecular orbital compositions (%) in the ground state for complex **1** computed at the PBE1PBE/LANL2DZ level.

| Orbital | Energy (eV) | Contribution (%) |       |       |             | Main bond type                                                |
|---------|-------------|------------------|-------|-------|-------------|---------------------------------------------------------------|
|         |             | Re               | CO    | Phen  | benzoxazole |                                                               |
| L+5     | -0.182      | 20.37            | 57.69 | 11.99 | 9.95        | p(Re) + $\pi^*$ (CO) + $\pi^*$ (benzoxazole) + $\pi^*$ (phen) |
| L+4     | -0.219      | 1.78             | 5.02  | 92.63 | 0.58        | $\pi^*$ (phen)                                                |
| L+3     | -0.563      | 23.18            | 32.89 | 30.99 | 12.95       | p(Re) + $\pi^*$ (CO) + $\pi^*$ (benzoxazole) + $\pi^*$ (phen) |
| L+2     | -1.020      | 2.82             | 1.83  | 93.63 | 1.72        | $\pi^*$ (phen)                                                |
| L+1     | -2.349      | 0.18             | 0.53  | 99.25 | 0.05        | $\pi^*$ (phen)                                                |
| L       | -2.412      | 4.26             | 4.17  | 88.80 | 2.68        | $\pi^*$ (phen)                                                |
| H       | -5.500      | 22.19            | 10.73 | 2.68  | 64.41       | d(Re) + $\pi$ (CO) + $\pi$ (benzoxazole)                      |
| H-1     | -6.150      | 1.69             | 0.66  | 1.17  | 96.47       | d(Re) + $\pi$ (benzoxazole)                                   |
| H-2     | -6.311      | 62.66            | 23.59 | 10.98 | 2.77        | d(Re) + $\pi$ (CO) + $\pi$ (phen)                             |
| H-3     | -6.491      | 67.00            | 27.89 | 3.06  | 2.05        | d(Re) + $\pi$ (CO)                                            |
| H-4     | -6.546      | 47.53            | 18.52 | 7.23  | 26.72       | d(Re) + $\pi$ (CO) + $\pi$ (benzoxazole)                      |
| H-5     | -6.969      | 5.06             | 3.53  | 7.67  | 83.75       | $\pi$ (benzoxazole)                                           |

**Table S7.** Frontier molecular orbital compositions (%) in the ground state for complex **2** computed at the PBE1PBE/LANL2DZ level.

| Orbital | Energy (eV) | Contribution (%) |       |       |             | Main bond type                                                |
|---------|-------------|------------------|-------|-------|-------------|---------------------------------------------------------------|
|         |             | Re               | CO    | phen  | benzoxazole |                                                               |
| L+5     | -3.075      | 21.35            | 51.02 | 12.92 | 14.71       | p(Re) + $\pi^*$ (CO) + $\pi^*$ (benzoxazole) + $\pi^*$ (phen) |
| L+4     | -3.212      | 11.16            | 28.79 | 17.04 | 43.01       | p(Re) + $\pi^*$ (CO) + $\pi^*$ (benzoxazole) + $\pi^*$ (phen) |
| L+3     | -3.823      | 3.48             | 2.84  | 90.56 | 3.12        | $\pi^*$ (phen)                                                |
| L+2     | -4.342      | 16.33            | 20.75 | 12.15 | 50.77       | p(Re) + $\pi^*$ (CO) + $\pi^*$ (benzoxazole) + $\pi^*$ (phen) |
| L+1     | -5.096      | 0.06             | 0.50  | 99.34 | 0.10        | $\pi^*$ (phen)                                                |
| L       | -5.290      | 4.79             | 4.23  | 88.03 | 2.95        | $\pi^*$ (phen)                                                |
| H       | -9.362      | 49.22            | 17.53 | 4.77  | 28.48       | d(Re) + $\pi$ (CO) + $\pi$ (benzoxazole)                      |
| H-1     | -9.626      | 59.13            | 20.64 | 17.13 | 3.09        | d(Re) + $\pi$ (CO) + $\pi$ (phen)                             |
| H-2     | -9.769      | 68.95            | 27.61 | 2.95  | 0.49        | d(Re) + $\pi$ (CO)                                            |
| H-3     | -10.263     | 0.95             | 0.64  | 0.57  | 97.84       | $\pi$ (benzoxazole)                                           |
| H-4     | -10.379     | 14.55            | 5.99  | 14.40 | 65.07       | d(Re) + $\pi$ (phen) + $\pi$ (benzoxazole)                    |
| H-5     | -10.380     | 11.09            | 3.96  | 82.12 | 2.83        | d(Re) + $\pi$ (phen)                                          |



**Table S8.** Frontier molecular orbital compositions (%) in the ground state for complex **3** computed at the PBE1PBE/LANL2DZ level.

| Orbital | Energy (eV) | Contribution (%) |       |       |             | Main bond type                                                                     |
|---------|-------------|------------------|-------|-------|-------------|------------------------------------------------------------------------------------|
|         |             | Re               | CO    | phen  | benzoxazole |                                                                                    |
| L+5     | -3.083      | 0.24             | 3.77  | 94.15 | 1.83        | $\pi^*(\text{phen})$                                                               |
| L+4     | -3.488      | 27.55            | 40.08 | 26.45 | 5.92        | $p(\text{Re}) + \pi^*(\text{CO}) + \pi^*(\text{phen})$                             |
| L+3     | -3.840      | 3.14             | 2.29  | 90.27 | 4.31        | $\pi^*(\text{phen})$                                                               |
| L+2     | -4.077      | 11.61            | 14.92 | 10.04 | 63.43       | $p(\text{Re}) + \pi^*(\text{CO}) + \pi^*(\text{benzoxazole}) + \pi^*(\text{phen})$ |
| L+1     | -5.118      | 0.29             | 0.63  | 97.70 | 1.38        | $\pi^*(\text{phen})$                                                               |
| L       | -5.316      | 4.53             | 3.94  | 88.56 | 2.98        | $\pi^*(\text{phen})$                                                               |
| H       | -9.303      | 47.20            | 16.21 | 8.25  | 28.34       | $d(\text{Re}) + \pi(\text{CO}) + \pi(\text{benzoxazole})$                          |
| H-1     | -9.502      | 65.66            | 23.74 | 7.75  | 2.85        | $d(\text{Re}) + \pi(\text{CO})$                                                    |
| H-2     | -9.679      | 68.90            | 27.45 | 3.02  | 0.64        | $d(\text{Re}) + \pi(\text{CO})$                                                    |
| H-3     | -10.150     | 2.53             | 1.08  | 7.90  | 88.49       | $\pi(\text{benzoxazole})$                                                          |
| H-4     | -10.190     | 3.60             | 2.18  | 39.21 | 55.02       | $\pi(\text{phen}) + \pi(\text{benzoxazole})$                                       |
| H-5     | -10.492     | 17.76            | 6.18  | 51.36 | 24.70       | $d(\text{Re}) + \pi(\text{phen}) + \pi(\text{benzoxazole})$                        |

**Table S9.** Frontier molecular orbital compositions (%) in the ground state for complex **4** computed at the PBE1PBE/LANL2DZ level.

| Orbital | Energy (eV) | Contribution (%) |       |       |             |                  | Main bond type                                                               |
|---------|-------------|------------------|-------|-------|-------------|------------------|------------------------------------------------------------------------------|
|         |             | Re               | CO    | phen  | benzoxazole | PPh <sub>3</sub> |                                                                              |
| L+5     | -2.828      | 10.53            | 0.91  | 12.39 | 5.51        | 70.65            | p(Re) + $\pi^*$ (phen) + $\pi^*$ (PPh <sub>3</sub> )                         |
| L+4     | -2.924      | 0.88             | 2.61  | 41.99 | 0.93        | 53.59            | $\pi^*$ (phen) + $\pi^*$ (PPh <sub>3</sub> )                                 |
| L+3     | -3.480      | 12.98            | 8.47  | 15.14 | 46.29       | 17.11            | p(Re) + $\pi^*$ (benzoxazole) + $\pi^*$ (phen) + $\pi^*$ (PPh <sub>3</sub> ) |
| L+2     | -3.522      | 4.70             | 2.25  | 81.31 | 6.47        | 5.27             | $\pi^*$ (phen)                                                               |
| L+1     | -4.807      | 0.45             | 0.47  | 97.87 | 0.25        | 0.97             | $\pi^*$ (phen)                                                               |
| L       | -4.962      | 6.39             | 2.21  | 84.30 | 3.63        | 3.47             | $\pi^*$ (phen)                                                               |
| H       | -8.371      | 53.26            | 12.25 | 4.03  | 25.05       | 5.42             | d(Re) + $\pi$ (CO) + $\pi$ (benzoxazole)                                     |
| H-1     | -8.532      | 62.28            | 10.81 | 11.58 | 6.02        | 9.32             | d(Re) + $\pi$ (CO) + $\pi$ (phen)                                            |
| H-2     | -8.933      | 65.77            | 27.18 | 3.35  | 0.76        | 2.93             | d(Re) + $\pi$ (CO)                                                           |
| H-3     | -9.062      | 0.78             | 0.34  | 0.50  | 0.27        | 98.11            | $\pi$ (PPh <sub>3</sub> )                                                    |
| H-4     | -9.191      | 6.44             | 2.07  | 0.79  | 2.66        | 88.04            | $\pi$ (PPh <sub>3</sub> )                                                    |
| H-5     | -9.304      | 8.75             | 2.42  | 0.64  | 4.81        | 83.38            | $\pi$ (PPh <sub>3</sub> )                                                    |

**Table S10.** Frontier molecular orbital compositions (%) in the ground state for complex **5** computed at the PBE1PBE/LANL2DZ level.

| Orbital | Energy (eV) | Contribution (%) |       |       |             |                     | Main bond type                                                                                                    |
|---------|-------------|------------------|-------|-------|-------------|---------------------|-------------------------------------------------------------------------------------------------------------------|
|         |             | Re               | CO    | phen  | benzoxazole | PPh <sub>2</sub> Me |                                                                                                                   |
| L+5     | -2.667      | 6.72             | 4.21  | 21.63 | 20.64       | 46.80               | $\pi^*(\text{benzoxazole}) + \pi^*(\text{phen}) + \pi^*(\text{PPh}_2\text{Me})$                                   |
| L+4     | -2.797      | 7.69             | 2.09  | 22.90 | 1.37        | 65.95               | $\pi^*(\text{phen}) + \pi^*(\text{PPh}_2\text{Me})$                                                               |
| L+3     | -3.417      | 3.99             | 1.89  | 86.86 | 3.25        | 4.01                | $\pi^*(\text{phen})$                                                                                              |
| L+2     | -3.549      | 13.11            | 10.36 | 11.56 | 52.09       | 12.88               | $p(\text{Re}) + \pi^*(\text{CO}) + \pi^*(\text{benzoxazole}) + \pi^*(\text{phen}) + \pi^*(\text{PPh}_2\text{Me})$ |
| L+1     | -4.699      | 0.38             | 0.54  | 98.03 | 0.28        | 0.78                | $\pi^*(\text{phen})$                                                                                              |
| L       | -4.853      | 5.78             | 2.12  | 85.34 | 3.57        | 3.19                | $\pi^*(\text{phen})$                                                                                              |
| H       | -8.424      | 54.06            | 12.63 | 3.87  | 25.01       | 4.44                | $d(\text{Re}) + \pi(\text{CO}) + \pi(\text{benzoxazole})$                                                         |
| H-1     | -8.653      | 63.62            | 12.63 | 10.89 | 5.49        | 7.37                | $d(\text{Re}) + \pi(\text{CO}) + \pi(\text{phen})$                                                                |
| H-2     | -9.021      | 64.92            | 27.71 | 3.20  | 0.69        | 3.48                | $d(\text{Re}) + \pi(\text{CO})$                                                                                   |
| H-3     | -9.156      | 6.65             | 2.00  | 0.71  | 2.61        | 88.03               | $\pi(\text{PPh}_2\text{Me})$                                                                                      |
| H-4     | -9.322      | 1.12             | 0.81  | 0.21  | 0.98        | 96.88               | $\pi(\text{PPh}_2\text{Me})$                                                                                      |
| H-5     | -9.568      | 6.45             | 1.58  | 3.16  | 4.17        | 84.65               | $\pi(\text{PPh}_2\text{Me})$                                                                                      |

**Table S11.** Frontier molecular orbital compositions (%) in the ground state for complex **6** computed at the PBE1PBE/LANL2DZ level.

| Orbital | Energy (eV) | Contribution (%) |       |       |             |                     | Main bond type                                                                     |
|---------|-------------|------------------|-------|-------|-------------|---------------------|------------------------------------------------------------------------------------|
|         |             | Re               | CO    | Phen  | benzoxazole | P(OEt) <sub>3</sub> |                                                                                    |
| L+5     | -2.650      | 3.95             | 10.87 | 71.27 | 13.44       | 0.48                | $\pi^*(\text{CO}) + \pi^*(\text{benzoxazole}) + \pi^*(\text{phen})$                |
| L+4     | -2.709      | 8.48             | 21.92 | 41.90 | 24.51       | 3.19                | $\pi^*(\text{CO}) + \pi^*(\text{benzoxazole}) + \pi^*(\text{phen})$                |
| L+3     | -3.459      | 4.54             | 2.01  | 88.42 | 2.45        | 2.58                | $\pi^*(\text{phen})$                                                               |
| L+2     | -3.651      | 16.80            | 10.20 | 12.58 | 55.54       | 4.89                | $p(\text{Re}) + \pi^*(\text{CO}) + \pi^*(\text{benzoxazole}) + \pi^*(\text{phen})$ |
| L+1     | -4.734      | 0.41             | 0.54  | 97.55 | 0.28        | 1.21                | $\pi^*(\text{phen})$                                                               |
| L       | -4.878      | 5.09             | 2.28  | 86.20 | 4.13        | 2.30                | $\pi^*(\text{phen})$                                                               |
| H       | -8.609      | 53.86            | 11.69 | 4.58  | 25.35       | 4.52                | $d(\text{Re}) + \pi(\text{CO}) + \pi(\text{benzoxazole})$                          |
| H-1     | -8.917      | 64.79            | 14.09 | 12.22 | 4.14        | 4.76                | $d(\text{Re}) + \pi(\text{CO}) + \pi(\text{phen})$                                 |
| H-2     | -9.165      | 66.94            | 28.68 | 3.16  | 0.53        | 0.68                | $d(\text{Re}) + \pi(\text{CO})$                                                    |
| H-3     | -9.829      | 2.15             | 1.05  | 4.66  | 90.02       | 2.12                | $\pi(\text{benzoxazole})$                                                          |
| H-4     | -9.872      | 8.76             | 2.45  | 49.11 | 17.43       | 22.24               | $d(\text{Re}) + \pi(\text{phen}) + \pi(\text{benzoxazole}) + \pi(\text{P(OEt)}_3)$ |
| H-5     | -9.928      | 11.29            | 3.88  | 12.01 | 70.77       | 2.04                | $d(\text{Re}) + \pi(\text{phen}) + \pi(\text{benzoxazole})$                        |

**Table S12.** Frontier molecular orbital compositions (%) in the ground state for complex **7** computed at the PBE1PBE/LANL2DZ level.

| Orbital | Energy (eV) | Contribution (%) |       |       |       | Main bond type                                                          |
|---------|-------------|------------------|-------|-------|-------|-------------------------------------------------------------------------|
|         |             | Re               | CO    | phen  | RCN   |                                                                         |
| L+5     | -3.179      | 13.07            | 31.59 | 18.72 | 36.62 | p(Re) + $\pi^*(\text{CO})$ + $\pi^*(\text{RCN})$ + $\pi^*(\text{phen})$ |
| L+4     | -3.570      | 21.10            | 35.26 | 15.35 | 28.29 | p(Re) + $\pi^*(\text{CO})$ + $\pi^*(\text{RCN})$ + $\pi^*(\text{phen})$ |
| L+3     | -3.878      | 2.69             | 2.47  | 93.83 | 1.01  | $\pi^*(\text{phen})$                                                    |
| L+2     | -4.282      | 18.08            | 23.56 | 13.13 | 45.23 | p(Re) + $\pi^*(\text{CO})$ + $\pi^*(\text{RCN})$ + $\pi^*(\text{phen})$ |
| L+1     | -5.164      | 0.08             | 0.50  | 99.41 | 0.01  | $\pi^*(\text{phen})$                                                    |
| L       | -5.351      | 4.46             | 3.92  | 89.18 | 2.43  | $\pi^*(\text{phen})$                                                    |
| H       | -9.101      | 17.77            | 6.84  | 1.56  | 73.82 | d(Re) + $\pi(\text{RCN})$                                               |
| H-1     | -9.644      | 30.50            | 10.35 | 3.59  | 55.56 | d(Re) + $\pi(\text{CO})$ + $\pi(\text{RCN})$                            |
| H-2     | -9.725      | 56.72            | 18.77 | 16.80 | 7.72  | d(Re) + $\pi(\text{CO})$ + $\pi(\text{phen})$                           |
| H-3     | -9.821      | 69.18            | 26.48 | 3.88  | 0.46  | d(Re) + $\pi(\text{CO})$                                                |
| H-4     | -10.308     | 22.44            | 7.83  | 9.36  | 60.38 | d(Re) + $\pi(\text{RCN})$                                               |
| H-5     | -10.468     | 10.80            | 3.41  | 83.38 | 2.42  | d(Re) + $\pi(\text{phen})$                                              |

**Table S13.** Frontier molecular orbital compositions (%) in the excited state for complex **1** computed at the PBE1PBE/LANL2DZ level.

| Orbital | Energy (eV) | Contribution (%) |       |       |             | Main bond type                                                                     |
|---------|-------------|------------------|-------|-------|-------------|------------------------------------------------------------------------------------|
|         |             | Re               | CO    | phen  | benzoxazole |                                                                                    |
| L+5     | -0.342      | 3.71             | 24.93 | 8.44  | 62.92       | $\pi^*(\text{CO}) + \pi^*(\text{benzoxazole}) + \pi^*(\text{phen})$                |
| L+4     | -0.500      | 16.75            | 61.00 | 10.55 | 11.69       | $p(\text{Re}) + \pi^*(\text{CO}) + \pi^*(\text{benzoxazole}) + \pi^*(\text{phen})$ |
| L+3     | -0.906      | 1.44             | 2.02  | 94.65 | 1.90        | $\pi^*(\text{phen})$                                                               |
| L+2     | -1.148      | 20.47            | 34.96 | 22.95 | 21.63       | $p(\text{Re}) + \pi^*(\text{CO}) + \pi^*(\text{benzoxazole}) + \pi^*(\text{phen})$ |
| L+1     | -2.298      | 2.15             | 4.09  | 90.34 | 3.43        | $\pi^*(\text{phen})$                                                               |
| L       | -2.522      | 0.03             | 0.37  | 99.58 | 0.02        | $\pi^*(\text{phen})$                                                               |
| H       | -6.231      | 41.76            | 19.60 | 2.87  | 35.77       | $d(\text{Re}) + \pi(\text{CO}) + \pi(\text{benzoxazole})$                          |
| H-1     | -6.571      | 50.40            | 22.09 | 23.22 | 4.29        | $d(\text{Re}) + \pi(\text{CO}) + \pi(\text{phen})$                                 |
| H-2     | -6.764      | 64.87            | 29.54 | 2.83  | 2.76        | $d(\text{Re}) + \pi(\text{CO})$                                                    |
| H-3     | -7.003      | 4.70             | 1.67  | 2.76  | 90.88       | $\pi(\text{benzoxazole})$                                                          |
| H-4     | -7.116      | 13.00            | 6.16  | 63.33 | 17.50       | $d(\text{Re}) + \pi(\text{phen}) + \pi(\text{benzoxazole})$                        |
| H-5     | -7.191      | 17.22            | 7.68  | 5.58  | 69.52       | $d(\text{Re}) + \pi(\text{benzoxazole})$                                           |

**Table S14.** Frontier molecular orbital compositions (%) in the excited state for complex **2** computed at the PBE1PBE/LANL2DZ level.

| Orbital | Energy (eV) | Contribution (%) |       |       |             | Main bond type                                                |
|---------|-------------|------------------|-------|-------|-------------|---------------------------------------------------------------|
|         |             | Re               | CO    | phen  | benzoxazole |                                                               |
| L+5     | -0.878      | 16.70            | 54.49 | 17.29 | 11.51       | p(Re) + $\pi^*$ (CO) + $\pi^*$ (benzoxazole) + $\pi^*$ (phen) |
| L+4     | -0.924      | 10.51            | 33.43 | 11.69 | 44.37       | p(Re) + $\pi^*$ (CO) + $\pi^*$ (benzoxazole) + $\pi^*$ (phen) |
| L+3     | -1.109      | 3.17             | 6.08  | 85.83 | 4.91        | $\pi^*$ (phen) + $\pi^*$ (CO)                                 |
| L+2     | -1.924      | 13.72            | 21.87 | 13.62 | 50.79       | p(Re) + $\pi^*$ (CO) + $\pi^*$ (benzoxazole) + $\pi^*$ (phen) |
| L+1     | -2.562      | 2.36             | 4.55  | 89.53 | 3.56        | $\pi^*$ (phen)                                                |
| L       | -2.703      | 0.01             | 0.37  | 99.57 | 0.05        | $\pi^*$ (phen)                                                |
| H       | -6.860      | 53.77            | 21.26 | 5.63  | 19.35       | d(Re) + $\pi$ (CO) + $\pi$ (benzoxazole)                      |
| H-1     | -6.951      | 42.64            | 17.42 | 36.70 | 3.24        | d(Re) + $\pi$ (CO) + $\pi$ (phen)                             |
| H-2     | -7.149      | 66.60            | 29.09 | 2.95  | 1.36        | d(Re) + $\pi$ (CO)                                            |
| H-3     | -7.428      | 25.37            | 9.19  | 63.85 | 1.58        | d(Re) + $\pi$ (CO) + $\pi$ (phen)                             |
| H-4     | -7.884      | 1.07             | 0.61  | 0.41  | 97.91       | $\pi$ (benzoxazole)                                           |
| H-5     | -8.031      | 5.43             | 2.36  | 14.99 | 77.23       | d(Re) + $\pi$ (phen) + $\pi$ (benzoxazole)                    |

**Table S15.** Frontier molecular orbital compositions (%) in the excited state for complex **3** computed at the PBE1PBE/LANL2DZ level.

| Orbital | Energy (eV) | Contribution (%) |       |       |             | Main bond type                                                |
|---------|-------------|------------------|-------|-------|-------------|---------------------------------------------------------------|
|         |             | Re               | CO    | phen  | benzoxazole |                                                               |
| L+5     | -0.697      | 11.83            | 42.66 | 8.51  | 37.00       | p(Re) + $\pi^*$ (CO) + $\pi^*$ (benzoxazole) + $\pi^*$ (phen) |
| L+4     | -1.119      | 2.32             | 4.14  | 91.08 | 2.47        | $\pi^*$ (phen)                                                |
| L+3     | -1.263      | 24.81            | 48.48 | 21.97 | 4.73        | p(Re) + $\pi^*$ (CO) + $\pi^*$ (benzoxazole)                  |
| L+2     | -1.708      | 9.28             | 15.72 | 8.75  | 66.25       | p(Re) + $\pi^*$ (CO) + $\pi^*$ (benzoxazole) + $\pi^*$ (phen) |
| L+1     | -2.578      | 2.22             | 4.18  | 90.29 | 3.31        | $\pi^*$ (phen)                                                |
| L       | -2.725      | 0.15             | 0.60  | 98.52 | 0.73        | $\pi^*$ (phen)                                                |
| H       | -6.829      | 45.68            | 17.99 | 19.99 | 16.34       | d(Re) + $\pi$ (CO) + $\pi$ (phen)+ $\pi$ (benzoxazole)        |
| H-1     | -6.967      | 62.31            | 25.20 | 8.91  | 3.58        | d(Re) + $\pi$ (CO) + $\pi$ (phen)                             |
| H-2     | -7.130      | 66.80            | 29.34 | 3.38  | 0.48        | d(Re) + $\pi$ (CO)                                            |
| H-3     | -7.364      | 8.36             | 3.11  | 77.15 | 11.37       | $\pi$ ( phen)                                                 |
| H-4     | -7.832      | 1.14             | 0.44  | 0.46  | 97.96       | d(Re) + $\pi$ (benzoxazole)                                   |
| H-5     | -8.050      | 11.13            | 4.37  | 5.17  | 79.33       | d(Re) + $\pi$ (phen)+ $\pi$ (benzoxazole)                     |



**Table S16.** Frontier molecular orbital compositions (%) in the excited state for complex **4** computed at the PBE1PBE/LANL2DZ level.

| Orbital | Energy (eV) | Contribution (%) |       |       |             |                  | Main bond type                                                                      |
|---------|-------------|------------------|-------|-------|-------------|------------------|-------------------------------------------------------------------------------------|
|         |             | Re               | CO    | phen  | benzoxazole | PPh <sub>3</sub> |                                                                                     |
| L+5     | -0.853      | 5.07             | 2.77  | 6.82  | 8.33        | 77.02            | p(Re) + $\pi^*$ (phen) + $\pi^*$ (PPh <sub>3</sub> ) + $\pi^*$ (benzoxazole)        |
| L+4     | -0.947      | 1.90             | 0.35  | 3.13  | 3.83        | 90.80            | $\pi^*$ (PPh <sub>3</sub> )                                                         |
| L+3     | -1.027      | 1.61             | 1.65  | 82.99 | 2.93        | 10.83            | $\pi^*$ (phen) + $\pi^*$ (PPh <sub>3</sub> )                                        |
| L+2     | -1.510      | 7.56             | 8.09  | 10.05 | 50.24       | 24.06            | p(Re)+ $\pi$ (CO)+ $\pi^*$ (phen)+ $\pi^*$ (benzoxazole)+ $\pi$ (PPh <sub>3</sub> ) |
| L+1     | -2.452      | 3.00             | 3.33  | 86.58 | 2.59        | 4.49             | $\pi^*$ (phen)                                                                      |
| L       | -2.602      | 0.06             | 0.35  | 98.49 | 0.08        | 1.01             | $\pi^*$ (phen)                                                                      |
| H       | -6.244      | 52.59            | 14.17 | 4.59  | 18.81       | 9.83             | d(Re) + $\pi$ (CO) + $\pi$ (benzoxazole)+ $\pi$ (PPh <sub>3</sub> )                 |
| H-1     | -6.379      | 55.84            | 14.06 | 12.28 | 6.50        | 11.31            | d(Re) + $\pi$ (CO) + $\pi$ (phen)+ $\pi$ (benzoxazole)+ $\pi$ (PPh <sub>3</sub> )   |
| H-2     | -6.772      | 63.15            | 30.54 | 3.67  | 1.53        | 1.11             | d(Re) + $\pi$ (CO)                                                                  |
| H-3     | -7.238      | 6.70             | 1.71  | 87.37 | 0.98        | 3.25             | d(Re) + $\pi$ (PPh <sub>3</sub> )                                                   |
| H-4     | 7.316       | 7.12             | 2.06  | 0.74  | 9.13        | 80.95            | d(Re) + $\pi$ (benzoxazole)+ $\pi$ (PPh <sub>3</sub> )                              |
| H-5     | -7.506      | 0.95             | 0.27  | 0.69  | 1.21        | 96.89            | $\pi$ (PPh <sub>3</sub> )                                                           |

**Table S17.** Frontier molecular orbital compositions (%) in the excited state for complex **5** computed at the PBE1PBE/LANL2DZ level.

| Orbital | Energy (eV) | Contribution (%) |       |       |             |                     | Main bond type                                                                            |
|---------|-------------|------------------|-------|-------|-------------|---------------------|-------------------------------------------------------------------------------------------|
|         |             | Re               | CO    | phen  | benzoxazole | PPh <sub>2</sub> Me |                                                                                           |
| L+5     | -0.723      | 6.43             | 2.29  | 3.42  | 9.13        | 78.73               | p(Re) + $\pi^*$ (benzoxazole) + $\pi^*$ (PPh <sub>2</sub> Me)                             |
| L+4     | -0.816      | 1.08             | 0.28  | 3.48  | 3.85        | 91.31               | $\pi^*$ (PPh <sub>2</sub> Me)                                                             |
| L+3     | -1.014      | 1.52             | 1.56  | 89.30 | 2.96        | 4.66                | $\pi^*$ (phen)                                                                            |
| L+2     | -1.459      | 8.26             | 8.56  | 10.08 | 57.19       | 15.92               | p(Re)+ $\pi^*$ (CO)+ $\pi^*$ (benzoxazole)+ $\pi^*$ (phen)+ $\pi^*$ (PPh <sub>2</sub> Me) |
| L+1     | -2.436      | 2.79             | 3.07  | 87.74 | 2.61        | 3.79                | $\pi^*$ (phen)                                                                            |
| L       | -2.608      | 0.12             | 0.39  | 98.70 | 0.14        | 0.65                | $\pi^*$ (phen)                                                                            |
| H       | -6.188      | 54.33            | 14.47 | 4.37  | 19.18       | 7.65                | d(Re) + $\pi$ (CO) + $\pi$ (benzoxazole)+ $\pi$ (PPh <sub>2</sub> Me)                     |
| H-1     | -6.340      | 57.16            | 14.61 | 11.88 | 6.12        | 10.24               | d(Re) + $\pi$ (CO) + $\pi$ (phen) + $\pi$ (PPh <sub>2</sub> Me)                           |
| H-2     | -6.718      | 63.74            | 30.84 | 3.09  | 1.49        | 0.85                | d(Re) + $\pi$ (CO)                                                                        |
| H-3     | -7.225      | 5.95             | 1.67  | 86.66 | 1.57        | 4.16                | d(Re) + $\pi$ (phen)                                                                      |
| H-4     | -7.330      | 5.01             | 1.29  | 1.69  | 7.10        | 84.91               | $\pi$ (benzoxazole) + $\pi$ (PPh <sub>2</sub> Me)                                         |
| H-5     | -7.627      | 0.90             | 0.24  | 2.66  | 1.12        | 95.08               | $\pi$ (PPh <sub>2</sub> Me)                                                               |

**Table S18.** Frontier molecular orbital compositions (%) in the excited state for complex **6** computed at the PBE1PBE/LANL2DZ level.

| Orbital | Energy (eV) | Contribution (%) |       |       |             |                     | Main bond type                                                                                              |
|---------|-------------|------------------|-------|-------|-------------|---------------------|-------------------------------------------------------------------------------------------------------------|
|         |             | Re               | CO    | Phen  | benzoxazole | P(OEt) <sub>3</sub> |                                                                                                             |
| L+5     | -0.294      | 0.29             | 8.36  | 81.11 | 8.04        | 2.19                | $\pi^*(\text{CO}) + \pi^*(\text{benzoxazole}) + \pi^*(\text{phen})$                                         |
| L+4     | -0.609      | 11.65            | 34.54 | 15.42 | 35.83       | 2.55                | $p(\text{Re}) + \pi^*(\text{CO}) + \pi^*(\text{benzoxazole}) + \pi^*(\text{phen})$                          |
| L+3     | -0.899      | 1.80             | 2.30  | 90.72 | 2.91        | 2.26                | $\pi^*(\text{phen})$                                                                                        |
| L+2     | -1.466      | 11.80            | 9.25  | 13.45 | 58.09       | 7.40                | $p(\text{Re}) + \pi^*(\text{CO}) + \pi^*(\text{benzoxazole}) + \pi^*(\text{phen}) + \pi^*(\text{P(OEt)}_3)$ |
| L+1     | -2.339      | 2.65             | 3.36  | 87.00 | 2.71        | 4.28                | $\pi^*(\text{phen})$                                                                                        |
| L       | -2.490      | 0.07             | 0.37  | 99.20 | 0.10        | 0.25                | $\pi^*(\text{phen})$                                                                                        |
| H       | -6.348      | 55.43            | 13.40 | 5.65  | 20.44       | 5.08                | $d(\text{Re}) + \pi(\text{CO}) + \pi(\text{benzoxazole})$                                                   |
| H-1     | -6.536      | 55.61            | 14.93 | 19.75 | 4.48        | 5.23                | $d(\text{Re}) + \pi(\text{CO}) + \pi(\text{phen})$                                                          |
| H-2     | -6.800      | 64.76            | 30.68 | 2.93  | 1.26        | 0.36                | $d(\text{Re}) + \pi(\text{CO})$                                                                             |
| H-3     | -7.128      | 12.01            | 3.06  | 79.71 | 2.02        | 3.20                | $d(\text{Re}) + \pi(\text{benzoxazole})$                                                                    |
| H-4     | -7.667      | 1.02             | 0.56  | 0.46  | 97.83       | 0.14                | $\pi(\text{benzoxazole})$                                                                                   |
| H-5     | -7.820      | 4.57             | 1.74  | 15.77 | 77.32       | 0.60                | $d(\text{Re}) + \pi(\text{phen}) + \pi(\text{benzoxazole})$                                                 |

**Table S19.** Frontier molecular orbital compositions (%) in the excited state for complex **7** computed at the PBE1PBE/LANL2DZ level.

| Orbital | Energy (eV) | Contribution (%) |       |       |       | Main bond type                                        |
|---------|-------------|------------------|-------|-------|-------|-------------------------------------------------------|
|         |             | Re               | CO    | phen  | RCN   |                                                       |
| L+5     | -0.995      | 11.03            | 35.61 | 11.28 | 42.08 | p(Re) + $\pi^*$ (CO) + $\pi^*$ (RCN) + $\pi^*$ (phen) |
| L+4     | -1.091      | 2.03             | 3.39  | 92.50 | 2.08  | $\pi^*$ (phen)                                        |
| L+3     | -1.254      | 19.61            | 43.24 | 13.78 | 23.36 | p(Re) + $\pi^*$ (CO) + $\pi^*$ (RCN) + $\pi^*$ (phen) |
| L+2     | -1.892      | 15.61            | 25.74 | 13.45 | 45.20 | p(Re) + $\pi^*$ (CO) + $\pi^*$ (RCN) + $\pi^*$ (phen) |
| L+1     | -2.574      | 2.53             | 4.65  | 90.02 | 2.80  | $\pi^*$ (phen)                                        |
| L       | -2.679      | 0.01             | 0.42  | 99.55 | 0.01  | $\pi^*$ (phen)                                        |
| H       | -6.832      | 26.31            | 10.65 | 2.83  | 60.20 | d(Re)+ $\pi$ (CO) + $\pi$ (RCN)                       |
| H-1     | -7.035      | 30.22            | 12.16 | 53.60 | 4.02  | d(Re) + $\pi$ (CO) + $\pi$ (phen)                     |
| H-2     | -7.246      | 29.25            | 10.97 | 4.52  | 55.26 | d(Re) + $\pi$ (CO) + $\pi$ (RCN)                      |
| H-3     | -7.265      | 67.52            | 28.72 | 3.34  | 0.42  | d(Re) + $\pi$ (CO)                                    |
| H-4     | -7.501      | 37.11            | 12.87 | 45.58 | 4.43  | d(Re) + $\pi$ (CO)+ $\pi$ (phen)                      |
| H-5     | -8.013      | 6.71             | 2.61  | 11.33 | 79.35 | d(Re) + $\pi$ (phen)+ $\pi$ (RCN)                     |

**Table S20.** Natural population (NPA) charges on selected atoms for complexes **1-7** computed at PBE1PBE/LANL2DZ<sup>#</sup> level.

| Atom | 1      | 2      | 3      | 4      | 5      | 6      | 7      |
|------|--------|--------|--------|--------|--------|--------|--------|
| Re   | -1.084 | -1.102 | -1.097 | -1.118 | -1.139 | -1.265 | -1.167 |
| C1   | 0.751  | 0.736  | 0.754  | 0.718  | 0.711  | 0.715  | 0.755  |
| C2   | 0.751  | 0.736  | 0.728  | 0.728  | 0.707  | 0.716  | 0.755  |
| C3   | 0.717  | 0.754  | 0.752  | -      | -      | -      | 0.760  |
| C4   | 0.426  | 0.536  | 0.539  | 0.550  | 0.550  | 0.545  | 0.507  |
| N1   | -0.356 | -0.379 | -0.378 | -0.382 | -0.374 | -0.372 | -0.377 |
| N2   | -0.356 | -0.379 | -0.379 | -0.376 | -0.375 | -0.372 | -0.377 |
| P1   | -      | -      | -      | 1.301  | 1.309  | 1.307  | -      |

<sup>#</sup> LANL2DZ for Re atom, 6-31g(d) for all other atoms

**Table S21:** Wiberg bond index, occupancies and natural hybrid orbital composition of the calculated natural bond orbitals (NBOs) for complexes **1-7** calculated at PBE1PBE/LANL2DZ<sup>#</sup> level.

| Complex | Bond (X-Y) | WBI    | Occupancy      | Bond Orbital                                                                                                                                         | EDX%  | EDY%  |
|---------|------------|--------|----------------|------------------------------------------------------------------------------------------------------------------------------------------------------|-------|-------|
| 1       | Re-CO(1)   | 1.2979 | 1.96053        | 0.6211 (s <sup>22.99%</sup> p <sup>16.85%</sup> d <sup>60.15%</sup> ) Re +<br>0.7837 (s <sup>65.98%</sup> p <sup>34.01%</sup> d <sup>0.01%</sup> ) C | 38.57 | 61.43 |
|         | Re-CO(2)   | 1.1997 | 1.92168        | 0.5625 (s <sup>14.55%</sup> p <sup>48.60%</sup> d <sup>36.85%</sup> ) Re +<br>0.8268 (s <sup>67.08%</sup> p <sup>32.91%</sup> d <sup>0.00%</sup> ) C | 31.64 | 68.36 |
|         | Re-CO(3)   | 1.2978 | 1.96053        | 0.6211 (s <sup>22.99%</sup> p <sup>16.85%</sup> d <sup>60.15%</sup> ) Re +<br>0.7837 (s <sup>65.98%</sup> p <sup>34.01%</sup> d <sup>0.01%</sup> ) C | 38.57 | 61.43 |
|         | Re-N1      | 0.4916 | 1.63936        | 0.9043 (s <sup>0.04%</sup> p <sup>1.12%</sup> d <sup>98.84%</sup> ) Re +<br>0.4269 (s <sup>0.06%</sup> p <sup>99.94%</sup> d <sup>0.00%</sup> ) N    | 81.77 | 18.23 |
|         | Re-C4      | 0.7525 | 1.85695        | 0.5644 (s <sup>10.04%</sup> p <sup>49.29%</sup> d <sup>40.67%</sup> ) Re +<br>0.8255 (s <sup>43.03%</sup> p <sup>56.97%</sup> d <sup>0.00%</sup> ) C | 31.86 | 68.14 |
| 2       | Re-CO(1)   | 1.2864 | 1.95508        | 0.6101 (s <sup>25.64%</sup> p <sup>19.15%</sup> d <sup>55.21%</sup> ) Re +<br>0.7923 (s <sup>66.48%</sup> p <sup>33.52%</sup> d <sup>0.00%</sup> ) C | 37.23 | 62.77 |
|         | Re-CO(2)   | 1.2863 | 1.95610        | 0.6101 (s <sup>25.52%</sup> p <sup>18.80%</sup> d <sup>55.67%</sup> ) Re +<br>0.7923 (s <sup>65.94%</sup> p <sup>34.05%</sup> d <sup>0.00%</sup> ) C | 37.23 | 62.77 |
|         | Re-CO(3)   | 1.1184 | 1.91343        | 0.5673 (s <sup>14.39%</sup> p <sup>47.08%</sup> d <sup>38.52%</sup> ) Re +<br>0.8235 (s <sup>66.72%</sup> p <sup>33.27%</sup> d <sup>0.00%</sup> ) C | 32.19 | 67.81 |
|         | Re-N1      | 0.4961 | 1.73757        | 0.9359 (s <sup>0.05%</sup> p <sup>0.37%</sup> d <sup>99.58%</sup> ) Re +<br>0.3522 (s <sup>0.00%</sup> p <sup>99.88%</sup> d <sup>0.12%</sup> ) C    | 87.59 | 12.41 |
|         | Re-C4      | 0.7848 | 1.88419        | 0.5347 (s <sup>11.02%</sup> p <sup>49.11%</sup> d <sup>39.87%</sup> ) Re +<br>0.8451 (s <sup>48.48%</sup> p <sup>51.52%</sup> d <sup>0.00%</sup> ) C | 28.59 | 71.41 |
| 3       | Re-CO(1)   | 1.2586 | 1.95345        | 0.6097 (s <sup>25.75%</sup> p <sup>18.59%</sup> d <sup>55.65%</sup> ) Re +<br>0.7926 (s <sup>65.77%</sup> p <sup>34.22%</sup> d <sup>0.01%</sup> ) C | 37.18 | 62.82 |
|         | Re-CO(2)   | 1.3015 | 1.95475        | 0.6088 (s <sup>26.33%</sup> p <sup>18.85%</sup> d <sup>54.82%</sup> ) Re +<br>0.7934 (s <sup>66.05%</sup> p <sup>33.95%</sup> d <sup>0.01%</sup> ) C | 37.06 | 62.94 |
|         | Re-CO(3)   | 1.1405 | 1.91462        | 0.5653 (s <sup>14.69%</sup> p <sup>48.20%</sup> d <sup>37.11%</sup> ) Re +<br>0.8249 (s <sup>66.49%</sup> p <sup>33.51%</sup> d <sup>0.00%</sup> ) C | 31.95 | 68.05 |
|         | Re-N1      | 0.4930 | 1.59048        | 0.9657 (s <sup>0.10%</sup> p <sup>1.97%</sup> d <sup>97.93%</sup> ) Re +<br>0.2597 (s <sup>0.97%</sup> p <sup>95.62%</sup> d <sup>3.41%</sup> ) N    | 93.25 | 6.75  |
|         | Re-C4      | 0.7640 | 1.88546<br>(σ) | 0.5309 (s <sup>11.51%</sup> p <sup>49.83%</sup> d <sup>38.66%</sup> ) Re +<br>0.8474 (s <sup>48.48%</sup> p <sup>51.73%</sup> d <sup>0.00%</sup> ) C | 28.18 | 71.82 |
| 4       | Re-CO(1)   | 1.3341 | 1.96313        | 0.6255 (s <sup>18.54%</sup> p <sup>17.32%</sup> d <sup>64.14%</sup> ) Re +<br>0.7802 (s <sup>66.31%</sup> p <sup>33.68%</sup> d <sup>0.01%</sup> ) C | 39.13 | 60.87 |
|         | Re-CO(2)   | 1.3294 | 1.96350        | 0.6278 (s <sup>18.32%</sup> p <sup>16.94%</sup> d <sup>64.74%</sup> ) Re +<br>0.7784 (s <sup>66.10%</sup> p <sup>33.89%</sup> d <sup>0.01%</sup> ) C | 39.41 | 60.59 |
|         | Re-P       | 0.7332 | 1.90258        | 0.5905 (s <sup>22.29%</sup> p <sup>25.15%</sup> d <sup>52.56%</sup> ) Re +<br>0.8070 (s <sup>33.54%</sup> p <sup>66.40%</sup> d <sup>0.00%</sup> ) P | 34.87 | 65.13 |
|         | Re-N1      | 0.5047 | 1.71017        | 0.9324 (s <sup>0.50%</sup> p <sup>4.73%</sup> d <sup>94.77%</sup> ) Re +<br>0.3615 (s <sup>0.37%</sup> p <sup>99.50%</sup> d <sup>0.13%</sup> ) C    | 86.93 | 13.07 |
|         | Re-C4      | 0.8741 | 1.60146        | 0.9927 (s <sup>0.01%</sup> p <sup>0.11%</sup> d <sup>99.88%</sup> ) Re +<br>0.1204 (s <sup>0.05%</sup> p <sup>59.11%</sup> d <sup>40.44%</sup> ) P   | 98.55 | 1.45  |
| 5       | Re-CO(1)   | 1.3605 | 1.95505        | 0.6210 (s <sup>22.75%</sup> p <sup>17.47%</sup> d <sup>59.78%</sup> ) Re +<br>0.7838 (s <sup>66.29%</sup> p <sup>33.70%</sup> d <sup>0.01%</sup> ) C | 38.57 | 61.43 |
|         | Re-CO(2)   | 1.3580 | 1.95501        | 0.6212 (s <sup>22.67%</sup> p <sup>17.24%</sup> d <sup>60.08%</sup> ) Re +<br>0.7837 (s <sup>66.34%</sup> p <sup>33.66%</sup> d <sup>0.01%</sup> ) C | 38.58 | 61.42 |
|         | Re-P       | 0.7462 | 1.85342        | 0.5576 (s <sup>12.29%</sup> p <sup>56.45%</sup> d <sup>31.26%</sup> ) Re +<br>0.8301 (s <sup>34.12%</sup> p <sup>65.82%</sup> d <sup>0.06%</sup> ) P | 31.10 | 68.90 |
|         | Re-N1      | 0.4982 | 1.73714        | 0.9344 (s <sup>0.01%</sup> p <sup>0.22%</sup> d <sup>99.76%</sup> ) Re +<br>0.3562 (s <sup>0.06%</sup> p <sup>99.89%</sup> d <sup>0.05%</sup> ) C    | 87.31 | 12.69 |
|         | Re-C4      | 0.8667 | 1.87750        | 0.5479 (s <sup>12.99%</sup> p <sup>42.77%</sup> d <sup>44.24%</sup> ) Re +<br>0.8365 (s <sup>43.82%</sup> p <sup>51.17%</sup> d <sup>0.00%</sup> ) C | 30.02 | 69.98 |
| 6       | Re-CO(1)   | 1.3528 | 1.95745        | 0.6211 (s <sup>22.73%</sup> p <sup>17.33%</sup> d <sup>59.94%</sup> ) Re +<br>0.7837 (s <sup>66.26%</sup> p <sup>33.73%</sup> d <sup>0.01%</sup> ) C | 38.58 | 61.42 |
|         | Re-CO(2)   | 1.3632 | 1.95628        | 0.6230 (s <sup>22.39%</sup> p <sup>17.08%</sup> d <sup>60.53%</sup> ) Re +<br>0.7822 (s <sup>66.31%</sup> p <sup>33.68%</sup> d <sup>0.01%</sup> ) C | 38.82 | 61.18 |
|         | Re-P       | 0.8209 | 1.87785        | 0.5849 (s <sup>3.22%</sup> p <sup>56.09%</sup> d <sup>40.70%</sup> ) Re +<br>0.8111 (s <sup>60.13%</sup> p <sup>39.70%</sup> d <sup>0.16%</sup> ) P  | 34.22 | 65.78 |
|         | Re-N1      | 0.4968 | 1.73753        | 0.9358 (s <sup>0.05%</sup> p <sup>0.39%</sup> d <sup>99.69%</sup> ) Re +                                                                             | 87.58 | 12.42 |

|   |          |        |         |                                                                                                                                                      |       |       |
|---|----------|--------|---------|------------------------------------------------------------------------------------------------------------------------------------------------------|-------|-------|
|   |          |        |         | 0.3528 (s <sup>0.00%</sup> p <sup>99.90%</sup> d <sup>0.10%</sup> ) C                                                                                |       |       |
|   | Re-C4    | 0.8508 | 1.88484 | 0.5471 (s <sup>12.74%</sup> p <sup>42.90%</sup> d <sup>44.36%</sup> ) Re +<br>0.8370 (s <sup>48.85%</sup> p <sup>51.15%</sup> d <sup>0.00%</sup> ) C | 29.94 | 70.06 |
| 7 | Re-CO(1) | 1.2545 | 1.95271 | 0.6070 (s <sup>25.77%</sup> p <sup>19.46%</sup> d <sup>54.77%</sup> ) Re +<br>0.7947 (s <sup>65.94%</sup> p <sup>34.06%</sup> d <sup>0.00%</sup> ) C | 36.85 | 63.15 |
|   | Re-CO(2) | 1.2546 | 1.95264 | 0.6070 (s <sup>25.78%</sup> p <sup>19.48%</sup> d <sup>54.74%</sup> ) Re +<br>0.7947 (s <sup>65.94%</sup> p <sup>34.06%</sup> d <sup>0.00%</sup> ) C | 36.84 | 63.16 |
|   | Re-CO(3) | 1.1177 | 1.92032 | 0.5660 (s <sup>14.38%</sup> p <sup>48.32%</sup> d <sup>37.30%</sup> ) Re +<br>0.8244 (s <sup>66.58%</sup> p <sup>33.42%</sup> d <sup>0.00%</sup> ) C | 32.03 | 67.97 |
|   | Re-N1    | 0.4956 | 1.62272 | 0.9250 (s <sup>0.04%</sup> p <sup>2.33%</sup> d <sup>97.63%</sup> ) Re +<br>0.3799 (s <sup>0.02%</sup> p <sup>99.98%</sup> d <sup>0.01%</sup> ) N    | 85.57 | 14.43 |
|   | Re-C4    | 0.8976 | 1.90985 | 0.5496 (s <sup>13.13%</sup> p <sup>50.14%</sup> d <sup>36.73%</sup> ) Re +<br>0.8354 (s <sup>62.47%</sup> p <sup>37.53%</sup> d <sup>0.00%</sup> ) C | 30.21 | 69.79 |

# LANL2DZ for Re atom, 6-31g(d) for all other atoms

**Table S22.** Second order perturbation interactions that contribute mainly to the ground state stabilization for complexes **1-7** from NBO analysis performed at the PBE1PBE/LANL2DZ<sup>#</sup> level.

| Complex | Donor (i)       | Acceptor(j)       | E(2)(kcalmol <sup>-1</sup> ) | E(j)-E(i) a.u | F(i, j) a.u |
|---------|-----------------|-------------------|------------------------------|---------------|-------------|
| 1       | n Re1           | $\sigma^*$ Re1-C4 | 125.13                       | 0.04          | 0.158       |
|         | n N1            | $n^*$ Re1         | 72.21                        | 0.68          | 0.203       |
|         | n Re1           | $\pi^*$ O1-C1     | 46.18                        | 0.21          | 0.099       |
|         | n Re1           | $\pi^*$ O2-C2     | 46.17                        | 0.21          | 0.099       |
|         | $\sigma$ Re1-N1 | $\pi^*$ O2-C2     | 28.22                        | 0.30          | 0.085       |
| 2       | n O3            | $\pi^*$ Re1-C3    | 178.54                       | 0.29          | 0.204       |
|         | n O3            | $\pi^*$ Re1-C3    | 177.07                       | 0.31          | 0.209       |
|         | n N1            | $n^*$ Re1         | 83.68                        | 0.66          | 0.216       |
|         | n N2            | $n^*$ Re1         | 58.21                        | 0.54          | 0.163       |
|         | n O41           | $\pi^*$ N3-C4     | 53.26                        | 0.33          | 0.121       |
| 3       | $\sigma$ N2-C28 | $\pi^*$ Re1-N2    | 101.46                       | 1.63          | 0.413       |
|         | n N2            | $n^*$ Re1         | 77.77                        | 0.61          | 0.202       |
|         | $\pi$ Re1-N2    | $\pi^*$ O2-C2     | 36.92                        | 0.28          | 0.097       |
|         | n Re1           | $\pi^*$ O3-C3     | 33.40                        | 0.25          | 0.086       |
|         | $\sigma$ Re1-N2 | $\pi^*$ O1-C1     | 26.79                        | 0.25          | 0.077       |
| 4       | $\sigma$ P1-C65 | $\pi^*$ Re1-P1    | 148.79                       | 1.03          | 0.354       |
|         | n N1            | $n^*$ Re1         | 75.96                        | 0.63          | 0.202       |
|         | n O41           | $\pi^*$ N3-C4     | 52.63                        | 0.32          | 0.119       |
|         | n Re1           | $\pi^*$ O1-C1     | 51.51                        | 0.19          | 0.097       |
|         | n Re1           | $\pi^*$ O2-C2     | 45.92                        | 0.23          | 0.101       |
| 5       | n N1            | $n^*$ Re1         | 72.57                        | 0.54          | 0.182       |
|         | n O41           | $\pi^*$ Re1-C4    | 54.78                        | 0.30          | 0.124       |
|         | $\pi$ N3-C14    | $\pi^*$ Re1-C4    | 50.80                        | 0.30          | 0.122       |
|         | n Re1           | $\pi^*$ O1-C1     | 49.35                        | 0.21          | 0.102       |
|         | n Re1           | $\pi^*$ O2-C2     | 49.31                        | 0.22          | 0.102       |
| 6       | n O60           | $n^*$ P1          | 175.09                       | 0.65          | 0.305       |
|         | n N2            | $n^*$ Re1         | 81.19                        | 0.64          | 0.209       |
|         | n N1            | $n^*$ Re1         | 61.38                        | 0.64          | 0.182       |
|         | n Re1           | $\pi^*$ O1-C1     | 52.51                        | 0.20          | 0.102       |
|         | n Re1           | $\pi^*$ O2-C2     | 42.91                        | 0.24          | 0.101       |
| 7       | n N2            | $n^*$ Re1         | 74.30                        | 0.66          | 0.204       |
|         | n N1            | $n^*$ Re1         | 73.71                        | 0.66          | 0.203       |
|         | n Re1           | $\pi^*$ O3-C3     | 33.48                        | 0.24          | 0.086       |
|         | n Re1           | $\pi^*$ O1-C1     | 26.65                        | 0.32          | 0.087       |
|         | n Re1           | $\pi^*$ N4-C4     | 17.80                        | 0.28          | 0.068       |

# LANL2DZ for Re atom, 6-31g(d) for all other atoms

### Scheme of the atom labelling

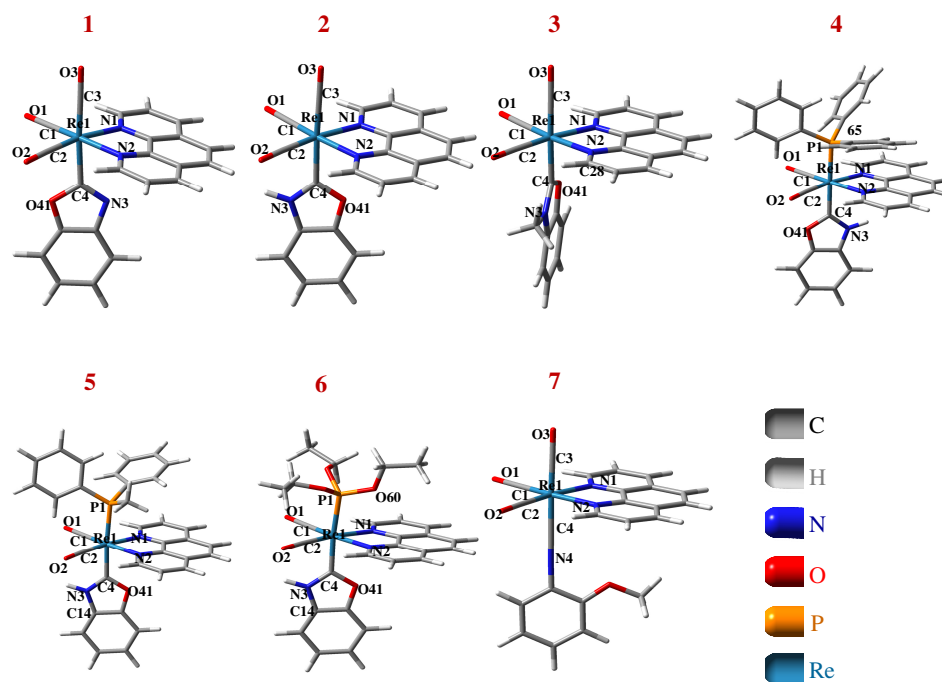



**Table S23.** Topological properties at the BCPs in Re-CO, Re-N and Re-C4 bonds computed at PBE1PBE/LANL2DZ<sup>#</sup> level.  $\rho(r)$  in units of  $e\text{\AA}^{-3}$ ,  $L(r)$  in units of  $e\text{\AA}^{-3}$ ,  $G(r)$ ,  $V(r)$ ,  $H(r)$  in units of a.u.  $\text{\AA}^{-3}$ .

| <b>Re-CO(1) BCP</b> |           |        |        |         |               |        |              |
|---------------------|-----------|--------|--------|---------|---------------|--------|--------------|
| Complex             | $\rho(r)$ | $L(r)$ | $G(r)$ | $H(r)$  | $\varepsilon$ | $V(r)$ | $-V(r)/G(r)$ |
| 1                   | 0.147     | -0.132 | 0.195  | -0.0625 | 0.122         | 0.257  | -1.317       |
| 2                   | 0.145     | -0.134 | 0.194  | -0.0601 | 0.063         | 0.254  | -1.309       |
| 3                   | 0.144     | -0.132 | 0.191  | -0.0594 | 0.045         | 0.251  | -1.314       |
| 4                   | 0.148     | -0.138 | 0.201  | -0.0633 | 0.027         | 0.265  | -1.318       |
| 5                   | 0.149     | -0.139 | 0.203  | -0.0642 | 0.070         | 0.268  | -1.320       |
| 6                   | 0.148     | -0.139 | 0.202  | -0.0628 | 0.043         | 0.265  | -1.311       |
| 7                   | 0.142     | -0.132 | 0.190  | -0.0584 | 0.074         | 0.249  | -1.310       |
| <b>Re-CO(2) BCP</b> |           |        |        |         |               |        |              |
| 1                   | 0.147     | -0.132 | 0.195  | -0.0625 | 0.122         | 0.258  | -1.323       |
| 2                   | 0.145     | -0.134 | 0.194  | -0.0601 | 0.064         | 0.254  | -1.309       |
| 3                   | 0.145     | -0.136 | 0.197  | -0.0608 | 0.039         | 0.258  | -1.309       |
| 4                   | 0.149     | -0.136 | 0.200  | -0.0645 | 0.083         | 0.265  | -1.325       |
| 5                   | 0.149     | -0.137 | 0.202  | -0.0646 | 0.069         | 0.267  | -1.321       |
| 6                   | 0.149     | -0.138 | 0.202  | -0.0646 | 0.100         | 0.267  | -1.321       |
| 7                   | 0.142     | -0.132 | 0.190  | -0.0584 | 0.074         | 0.249  | -1.310       |
| <b>Re-L* BCP</b>    |           |        |        |         |               |        |              |
| 1                   | 0.132     | -0.127 | 0.178  | -0.0506 | 0.026         | 0.227  | -1.275       |
| 2                   | 0.128     | -0.124 | 0.170  | -0.0469 | 0.043         | 0.217  | -1.276       |
| 3                   | 0.130     | -0.125 | 0.174  | -0.0487 | 0.075         | 0.223  | -1.281       |
| 4                   | 0.074     | -0.040 | 0.063  | -0.0223 | 0.111         | 0.085  | -1.349       |
| 5                   | 0.077     | -0.039 | 0.064  | -0.0240 | 0.055         | 0.088  | -1.375       |
| 6                   | 0.087     | -0.049 | 0.078  | -0.0281 | 0.106         | 0.106  | -1.358       |
| 7                   | 0.127     | -0.125 | 0.171  | -0.0463 | 0.013         | 0.218  | -1.274       |
| <b>Re-N(1) BCP</b>  |           |        |        |         |               |        |              |
| 1                   | 0.079     | -0.092 | 0.101  | -0.0095 | 0.204         | 0.111  | -1.099       |
| 2                   | 0.078     | -0.089 | 0.099  | -0.0096 | 0.241         | 0.109  | -1.101       |
| 3                   | 0.078     | -0.090 | 0.099  | -0.0095 | 0.225         | 0.108  | -1.090       |
| 4                   | 0.078     | -0.093 | 0.102  | -0.0093 | 0.397         | 0.112  | -1.098       |
| 5                   | 0.079     | -0.092 | 0.102  | -0.0096 | 0.326         | 0.111  | -1.088       |
| 6                   | 0.078     | -0.091 | 0.100  | -0.0094 | 0.316         | 0.109  | -1.090       |
| 7                   | 0.077     | -0.089 | 0.098  | -0.0095 | 0.230         | 0.107  | -1.091       |
| <b>Re-C(4) BCP</b>  |           |        |        |         |               |        |              |
| 1                   | 0.106     | -0.064 | 0.100  | -0.0361 | 0.105         | 0.136  | -1.360       |
| 2                   | 0.105     | -0.083 | 0.116  | -0.0333 | 0.131         | 0.149  | -1.284       |
| 3                   | 0.100     | -0.078 | 0.108  | -0.0301 | 0.133         | 0.138  | -1.277       |
| 4                   | 0.119     | -0.089 | 0.132  | -0.0434 | 0.111         | 0.175  | -1.325       |
| 5                   | 0.118     | -0.087 | 0.130  | -0.0430 | 0.126         | 0.173  | -1.330       |
| 6                   | 0.116     | -0.087 | 0.128  | -0.0414 | 0.140         | 0.169  | -1.320       |
| 7                   | 0.109     | -0.098 | 0.133  | -0.0349 | 0.011         | 0.168  | -1.263       |

\* L= CO(3) for 1-3 and 7

L=P for 4-6

# LANL2DZ for Re atom, 6-31g(d) for all other atoms

**Table S24.** Selected bond parameters for complexes **1-7** in the low lying triplet excited state at the TDDFT and CIS methods.

| Bond Parameters    | 1     |       | 2     |       | 3     |       | 4     |       | 5     |       | 6     |       | 7     |       |
|--------------------|-------|-------|-------|-------|-------|-------|-------|-------|-------|-------|-------|-------|-------|-------|
|                    | TDDFT | CIS   |
| <b>Re-C1(Å)</b>    | 1.929 | 1.967 | 1.926 | 1.973 | 1.935 | 1.979 | 1.908 | 1.913 | 1.964 | 1.904 | 1.905 | 1.909 | 1.933 | 1.975 |
| <b>Re-C2(Å)</b>    | 1.929 | 1.925 | 1.926 | 1.921 | 1.922 | 1.926 | 1.968 | 1.978 | 1.898 | 1.977 | 1.960 | 1.976 | 1.933 | 1.934 |
| <b>Re-C3(Å)</b>    | 2.018 | 2.027 | 1.979 | 2.007 | 1.975 | 2.004 | -     | -     | -     | -     | -     | -     | 1.979 | 2.010 |
| <b>Re-C4(Å)</b>    | 2.053 | 2.080 | 2.122 | 2.124 | 2.144 | 2.138 | 2.081 | 2.083 | 2.080 | 2.090 | 2.089 | 2.093 | 2.062 | 2.049 |
| <b>Re-N1(Å)</b>    | 2.177 | 2.169 | 2.175 | 2.185 | 2.182 | 2.189 | 2.069 | 2.070 | 2.189 | 2.070 | 2.072 | 2.060 | 2.180 | 2.188 |
| <b>Re-N2(Å)</b>    | 2.177 | 2.097 | 2.175 | 2.069 | 2.162 | 2.062 | 2.195 | 2.180 | 2.071 | 2.171 | 2.186 | 2.172 | 2.180 | 2.075 |
| <b>Re-P1(Å)</b>    | -     | -     | -     | -     | -     | -     | 2.542 | 2.548 | 2.513 | 2.518 | 2.448 | 2.461 | -     | -     |
| <b>C1-Re-C2(°)</b> | 87.52 | 89.92 | 90.77 | 90.82 | 90.97 | 91.85 | 91.50 | 91.48 | 90.40 | 89.35 | 89.79 | 89.12 | 90.77 | 91.17 |
| <b>N1-Re-N2(°)</b> | 76.61 | 77.40 | 74.96 | 77.18 | 74.72 | 77.13 | 77.35 | 77.63 | 77.35 | 77.79 | 77.15 | 77.65 | 74.87 | 77.14 |

**Figure S1.** (a) The correlation between the calculated HOMO energies and the IP values. (b) The correlation between the calculated LUMO energies and the EA values computed at the PBE1PBE/LANL2DZ# level.

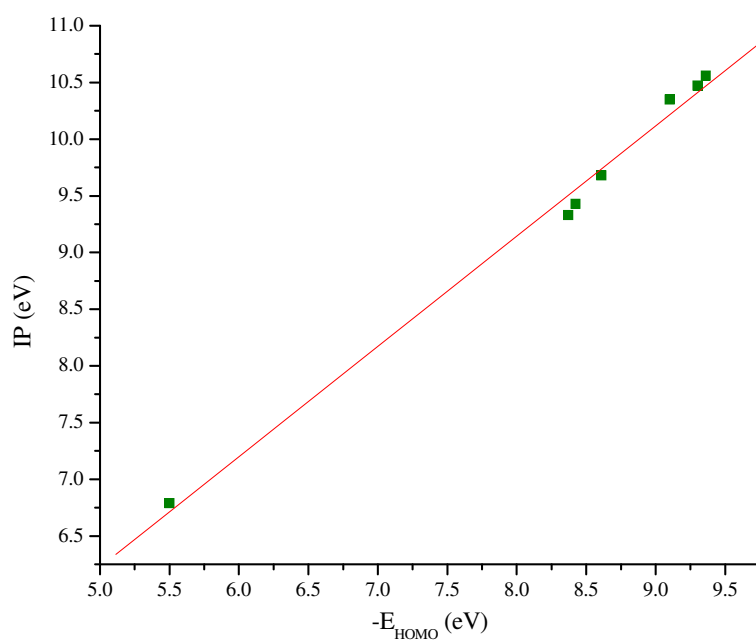

**(a)**

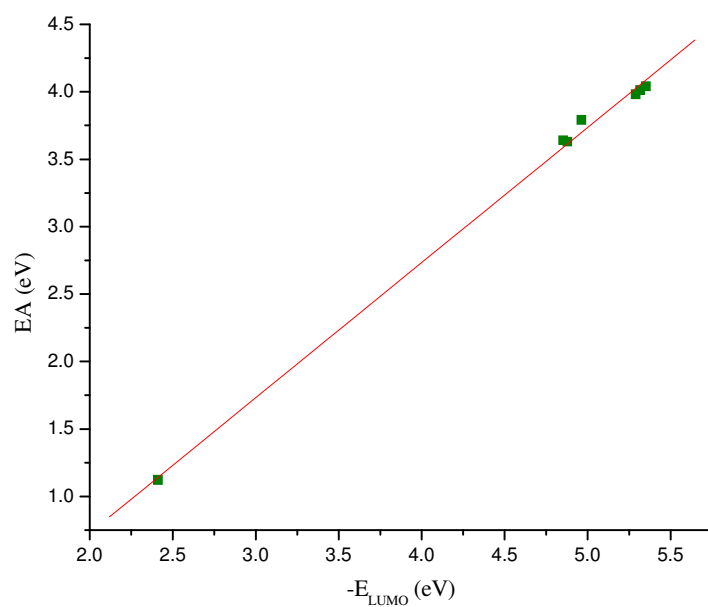

**(b)**

# LANL2DZ for Re atom, 6-31g(d) for all other atoms

**Figure S2.** Ground state stabilizing interactions of complexes **1-7**, showing  $n \rightarrow \sigma^*$  and  $n \rightarrow n^*$  interactions.

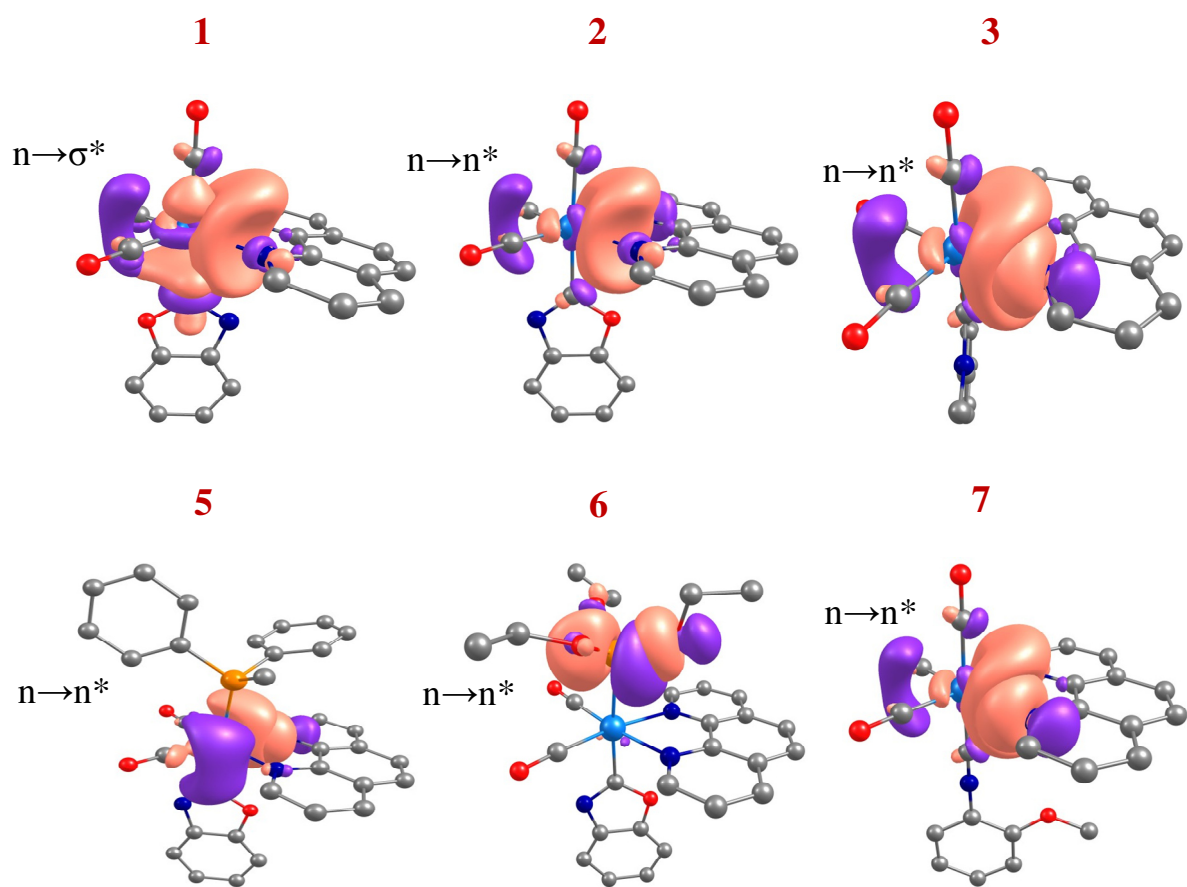

**Figure S3.** a) Molecular graph of the complexes **1-7**. All critical points are shown, as are attractors by greater circles: BCPs, small red circles; RCPs, yellow ones. The bond paths are also shown. b) Contour line diagrams of the Laplacian distribution in the plane contains the Re, CO(3) and benzoxazole ligands.

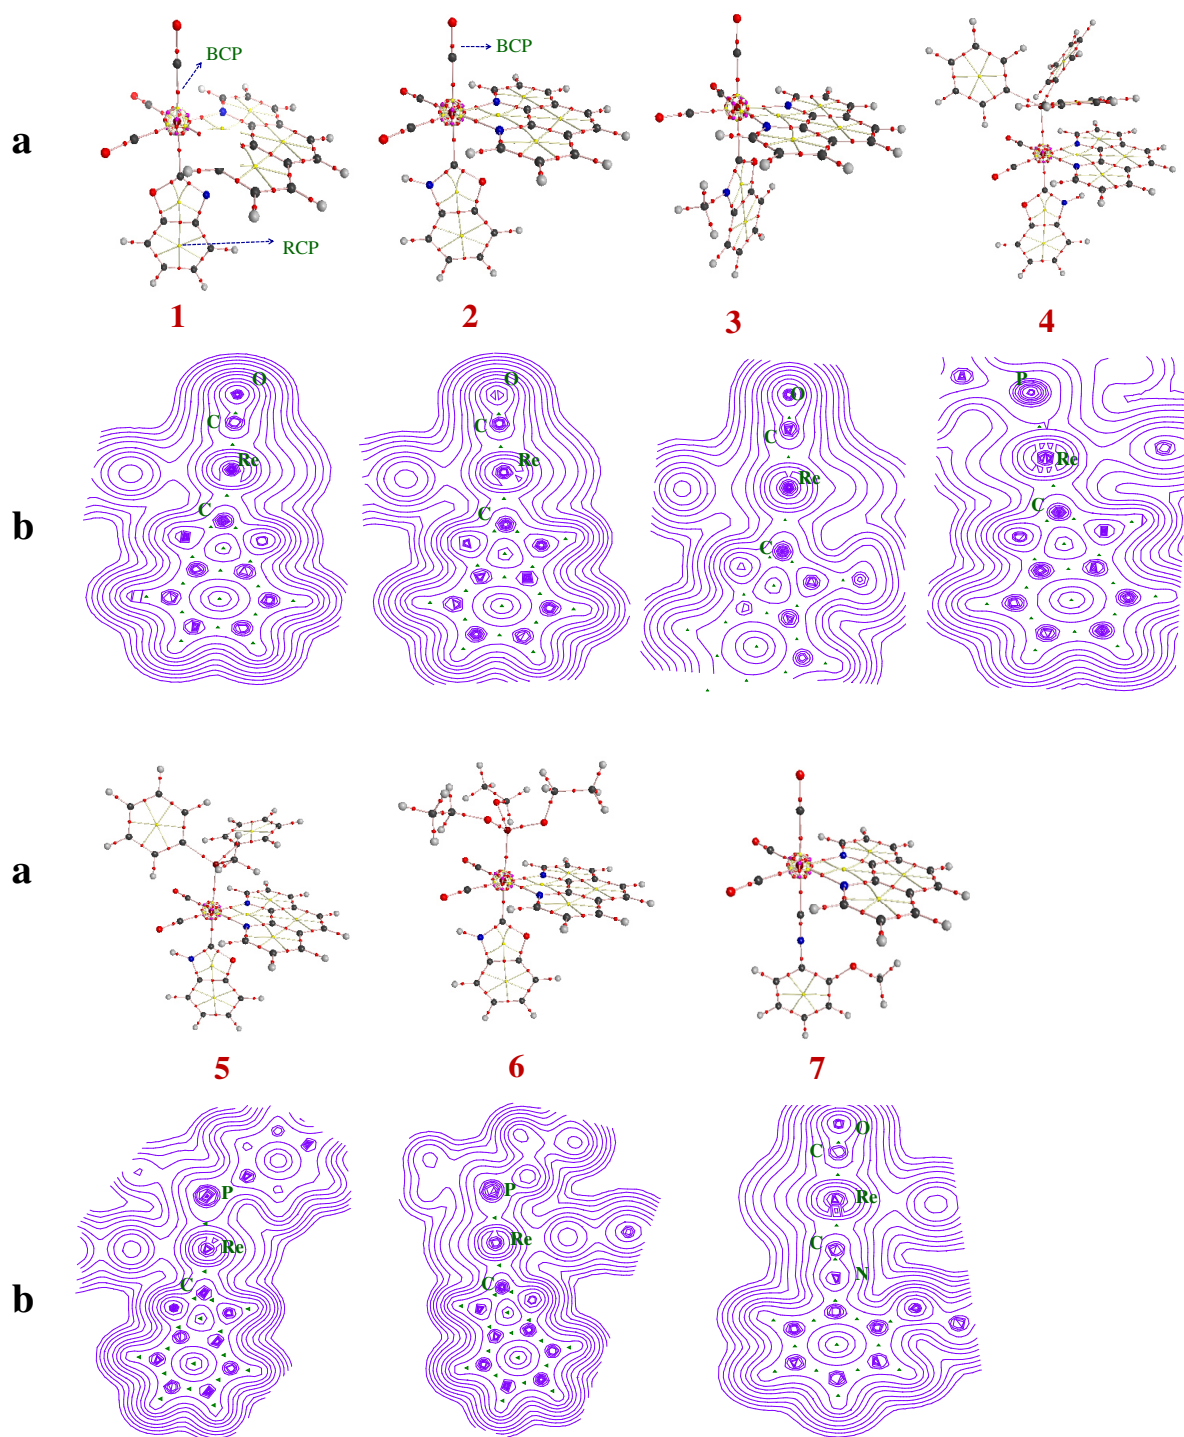

**Figure S4.** Effect of Solvent on Absorption Spectra of Complexes **1-7** computed at PBE1PBE/LANL2DZ level.

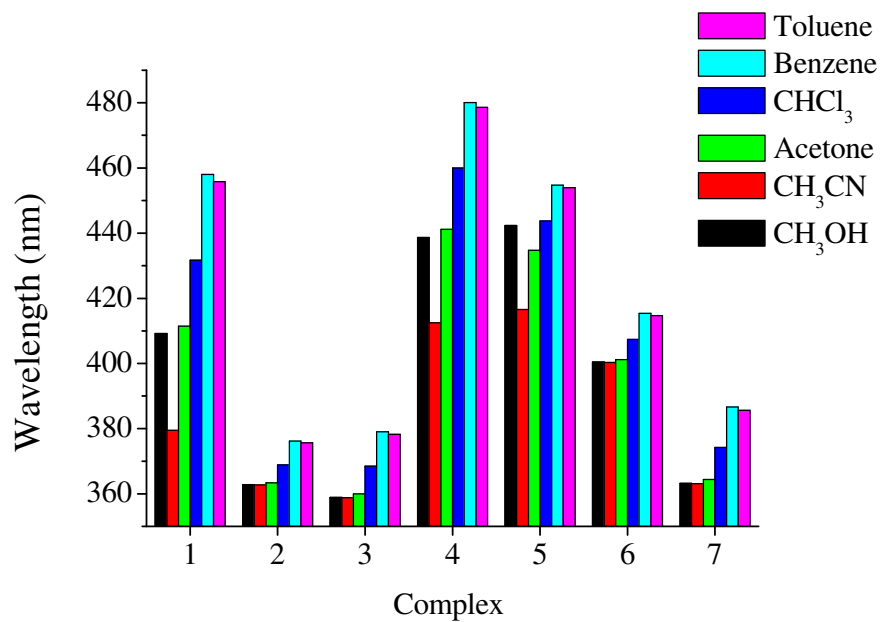

**Figure S5.** Effect of Solvent on Phosphorescence Spectra of Complexes **1-7** computed at PBE1PBE/LANL2DZ level.

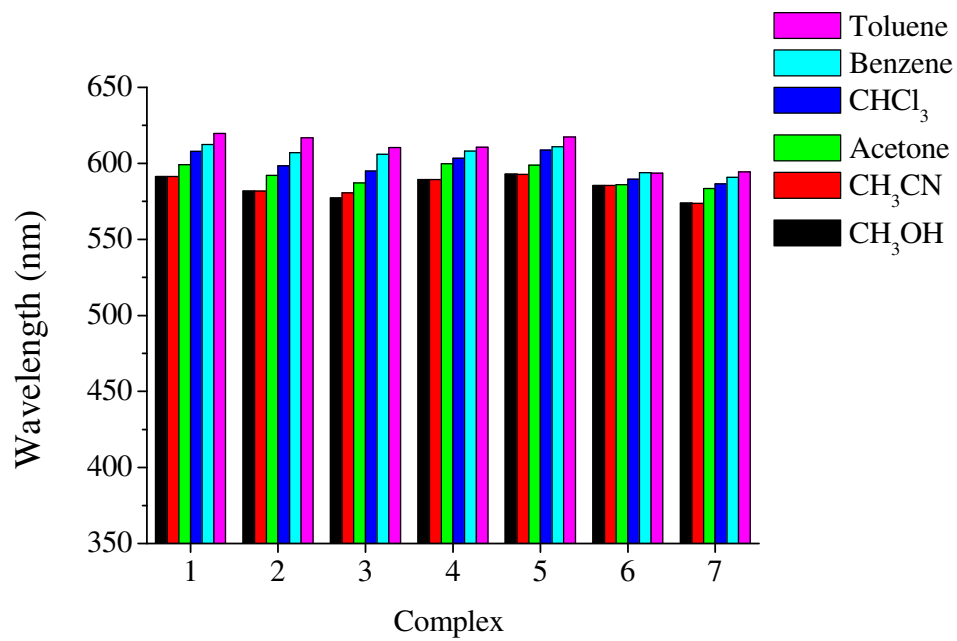

**Figure S6.** Natural Transition Orbitals (NTOs) for the Complex **3** and **4** illustrating the nature of optically active singlet excited states in the absorption bands. Shown are only occupied (holes) and unoccupied (electrons) NTO pairs that contribute more than 50% to each excited state. All transitions have mixed  $^1\text{MLCT}/^1\text{LLCT}$  character.

| Complex | $\lambda_{\text{cal}}$ (nm) |                    | Hole                                                                                | Electron                                                                              |
|---------|-----------------------------|--------------------|-------------------------------------------------------------------------------------|---------------------------------------------------------------------------------------|
| 3       | 358.8                       | $S_1$<br>W=0.98    | 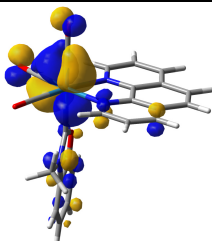   |    |
|         | 296.1                       | $S_8$<br>W=0.54    |    |    |
|         | 271.3                       | $S_{13}$<br>W=0.62 |   |   |
| 4       | 412.5                       | $S_2$<br>W=0.88    |  |  |
|         | 338.9                       | $S_6$<br>W=0.99    |  |  |
|         | 319.7                       | $S_8$<br>W=0.97    |  |  |



**Figure S7.** Natural Transition Orbitals (NTOs) for the Complex **5** and **6** illustrating the nature of optically active singlet excited states in the absorption bands. Shown are only occupied (holes) and unoccupied (electrons) NTO pairs that contribute more than 50% to each excited state. All transitions have mixed  $^1\text{MLCT}/^1\text{LLCT}$  character.

| Complex | $\lambda_{\text{cal}}$ (nm) |                 | Hole                                                                                | Electron                                                                              |
|---------|-----------------------------|-----------------|-------------------------------------------------------------------------------------|---------------------------------------------------------------------------------------|
| 5       | 416.6                       | $S_1$<br>W=0.99 | 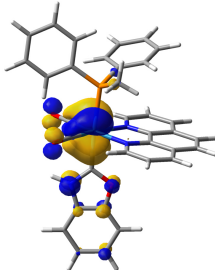   |    |
|         | 380.4                       | $S_3$<br>W=0.61 |    |    |
|         | 323.6                       | $S_8$<br>W=0.96 |   |   |
| 6       | 400.3                       | $S_1$<br>W=0.99 |  |  |
|         | 357.8                       | $S_3$<br>W=0.55 |  |  |
|         | 312.6                       | $S_8$<br>W=0.96 |  |  |

**Figure S8.** Natural Transition Orbitals (NTOs) for the Complex **7** illustrating the nature of optically active singlet excited states in the absorption bands. Shown are only occupied (holes) and unoccupied (electrons) NTO pairs that contribute more than 50% to each excited state. All transitions have mixed  ${}^1\text{MLCT}/{}^1\text{LLCT}$  character.

| Complex | $\lambda_{\text{cal}}$ (nm) |                    | Hole                                                                                | Electron                                                                              |
|---------|-----------------------------|--------------------|-------------------------------------------------------------------------------------|---------------------------------------------------------------------------------------|
| 7       | 363.1                       | $S_1$<br>W=0.99    | 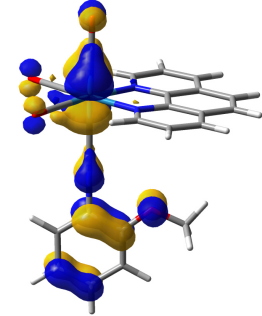   |    |
|         | 311.6                       | $S_5$<br>W=0.85    |   |   |
|         | 292.9                       | $S_{10}$<br>W=0.56 |  |  |

**Figure S9.** The schematic energy diagrams of the molecular orbital related to the phosphorescence of **1-7**. Assignments of bands are given in Table 5.

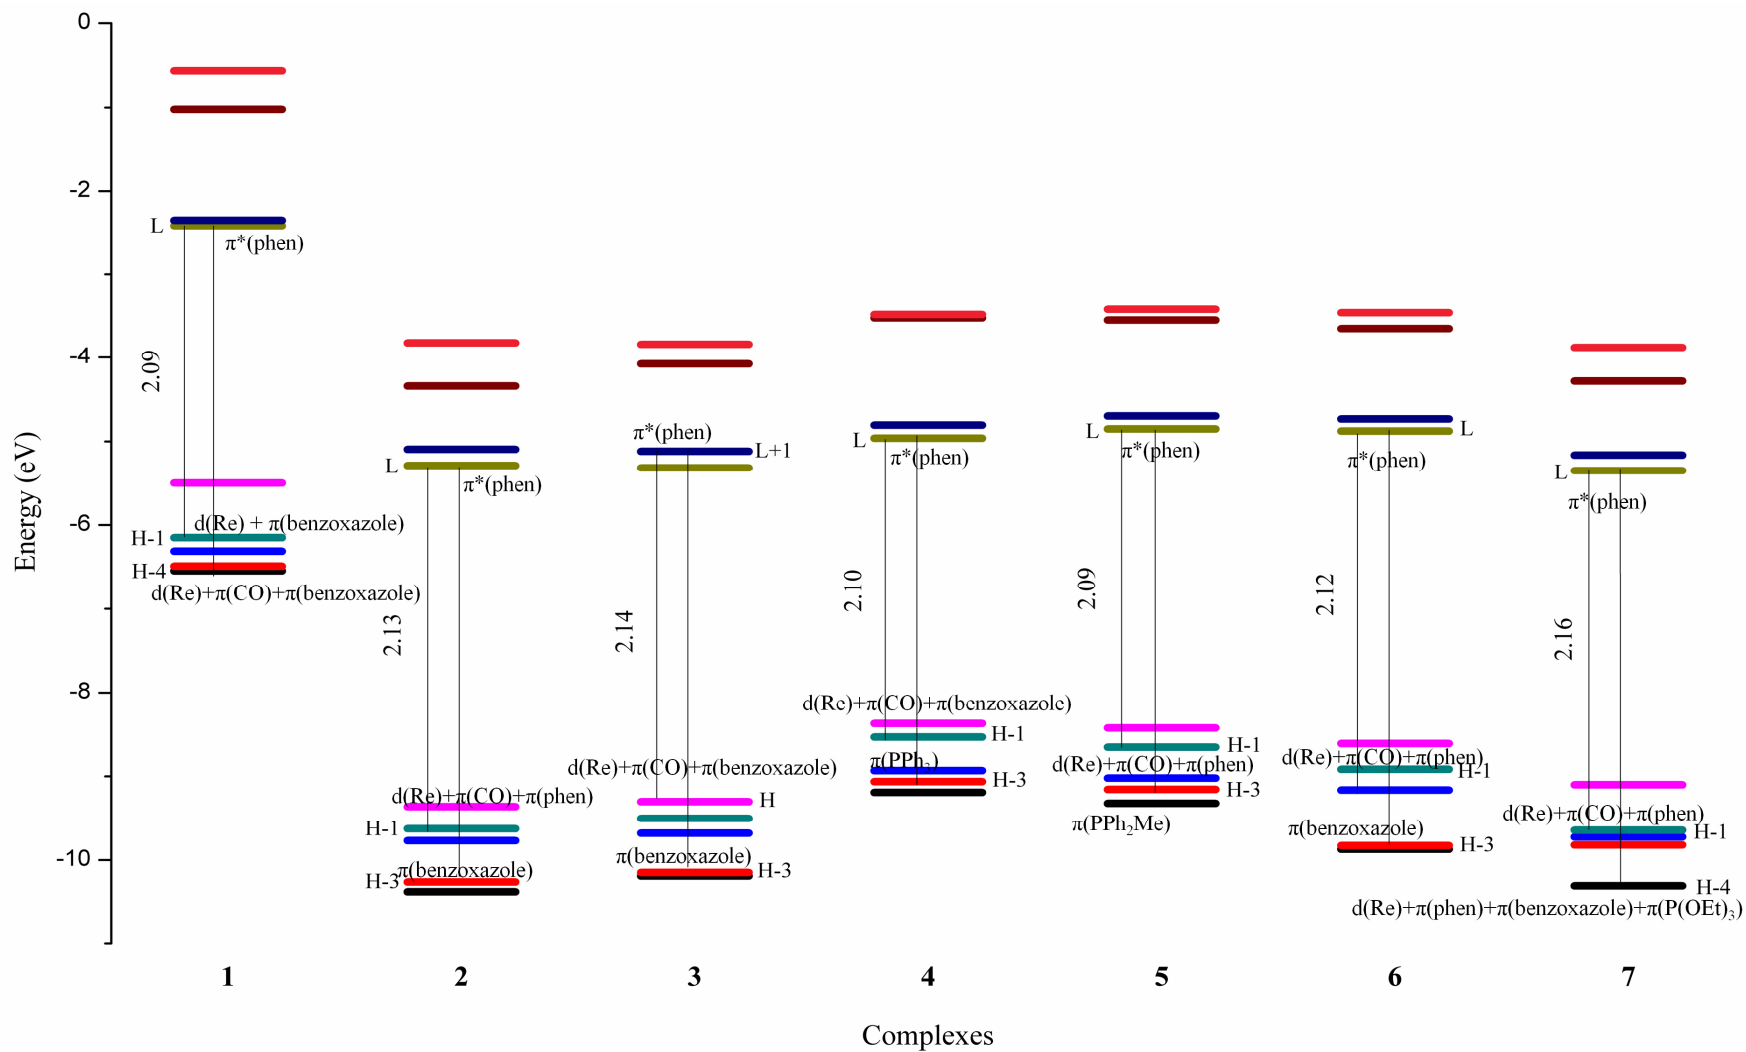

Supplement: c4cp01135j1.pdf [file c4cp01135j1.pdf]
